# Supplementary material for: Synthesis of Multi-butylnaphthalene Base Oils Catalyzed by Trifluoromethanesulfonic Acid and Its Lubricating Properties
Source: MDPI journal article supplement (doi:10.3390/lubricants11040156), 2023-03-24
Supplement: s1 [file s1]

## Supplementary Materials

### Synthesis of Multi-butylnaphthalene Base Oils Catalyzed by Trifluoromethanesulfonic Acid and Its Lubricating Properties

Yuanyuan Li, Chen Chen, Qiong Tang\*, Lei Liu\* and Jinxiang Dong

College of Chemical Engineering and Technology, Taiyuan University of Technology, Taiyuan 030024, Shanxi, China

\*Correspondence: tangqiong@tyut.edu.cn (Q.T.); liulei@tyut.edu.cn (L.L.)

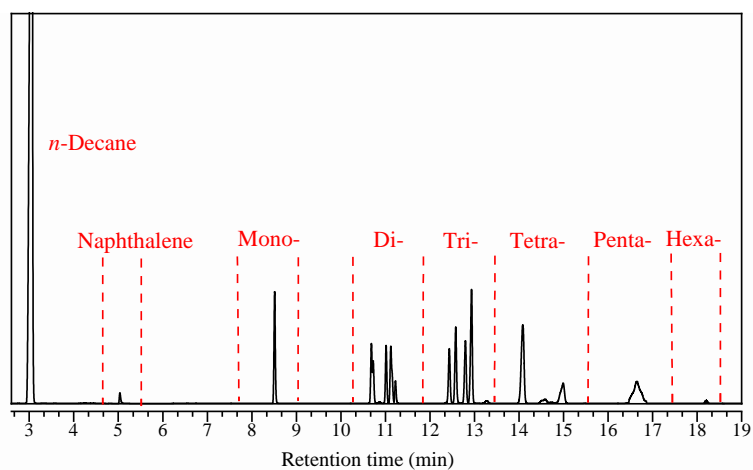

Figure S1. Retention time of the alkylation of naphthalene with *n*-butene.

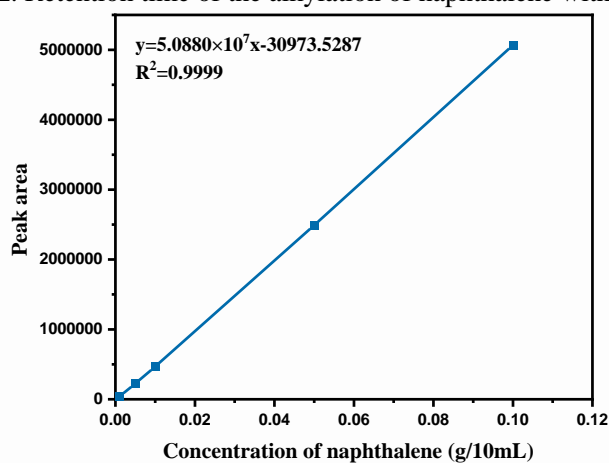

Figure S2. The standard curve of naphthalene.

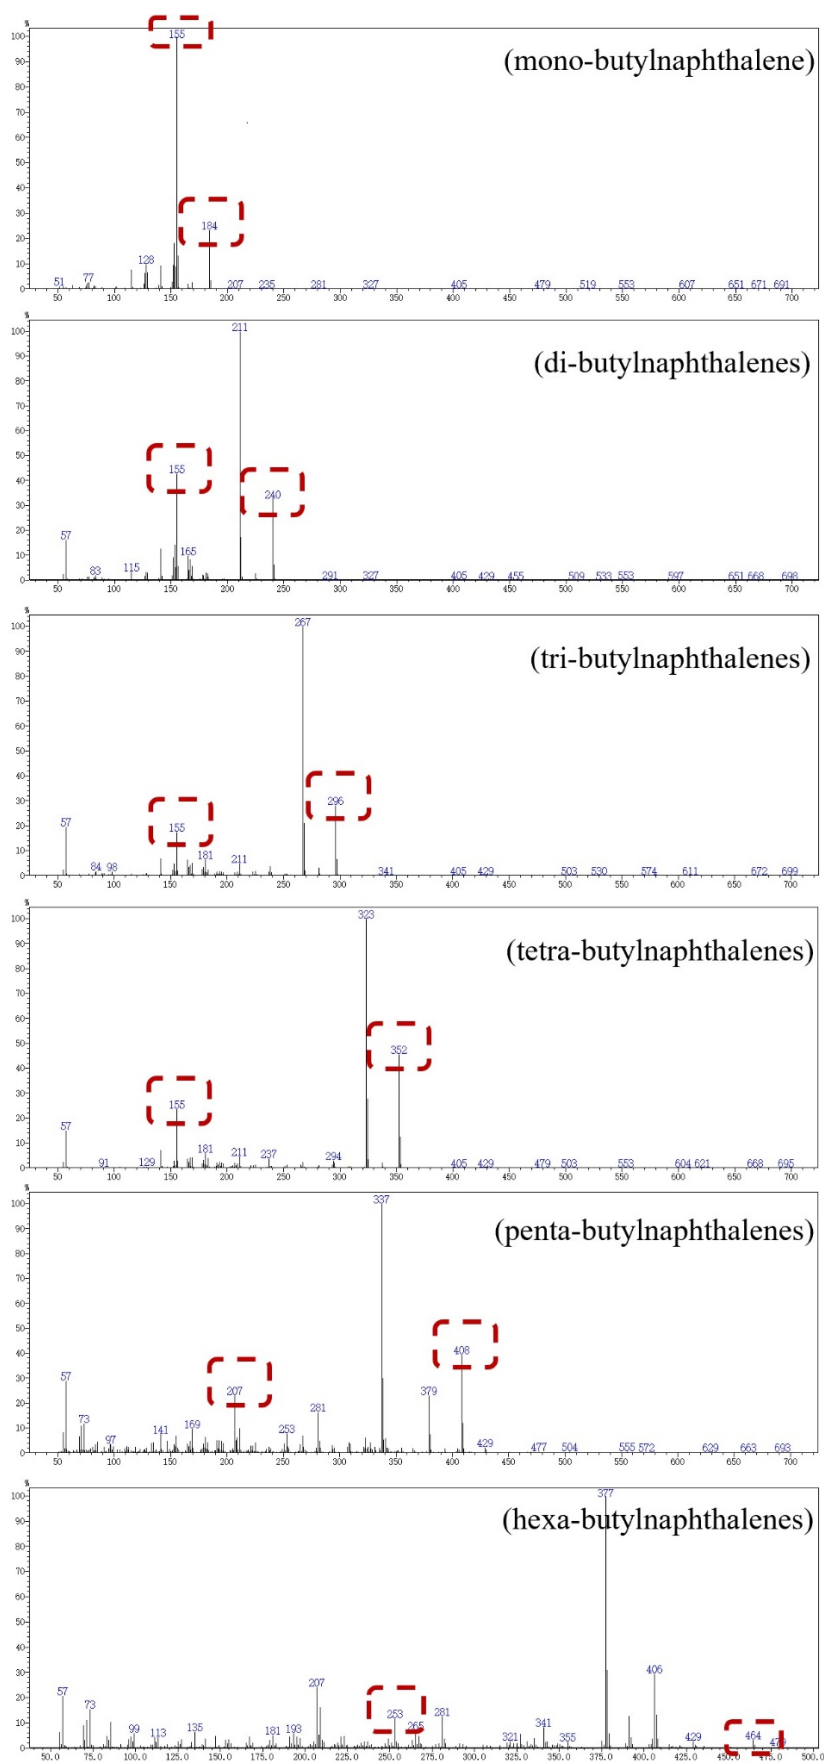

**Figure S3.** The GC-MS results of the multi-butyl naphthalenes.

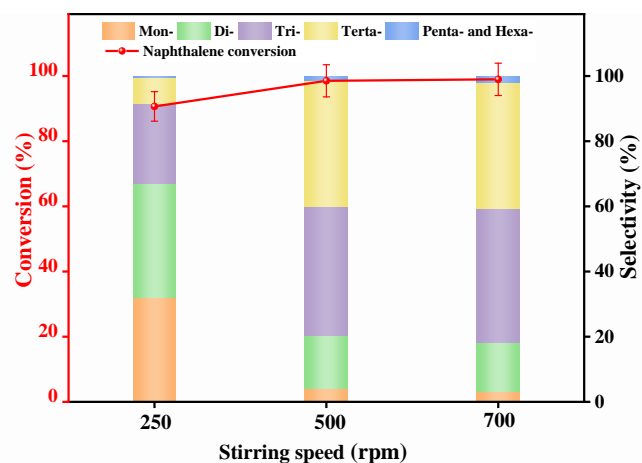

**Figure S4** Effect of stirring speed on the alkylation of naphthalene with *n*-butene.

Reaction conditions: TfOH dosage=3.2 wt%; T=60 °C; flow rate of *n*-butene=20 mL/min; 40 min.
